# Supplementary material
Source: publisher figshare collection journal article supplement (https://becaris.figshare.com/articles/dataset/_/25745706)
Supplement: Supplementary file 1 [file 1]

**Appendix** **5. Exploratory analysis of the BFR and resistance training**

**
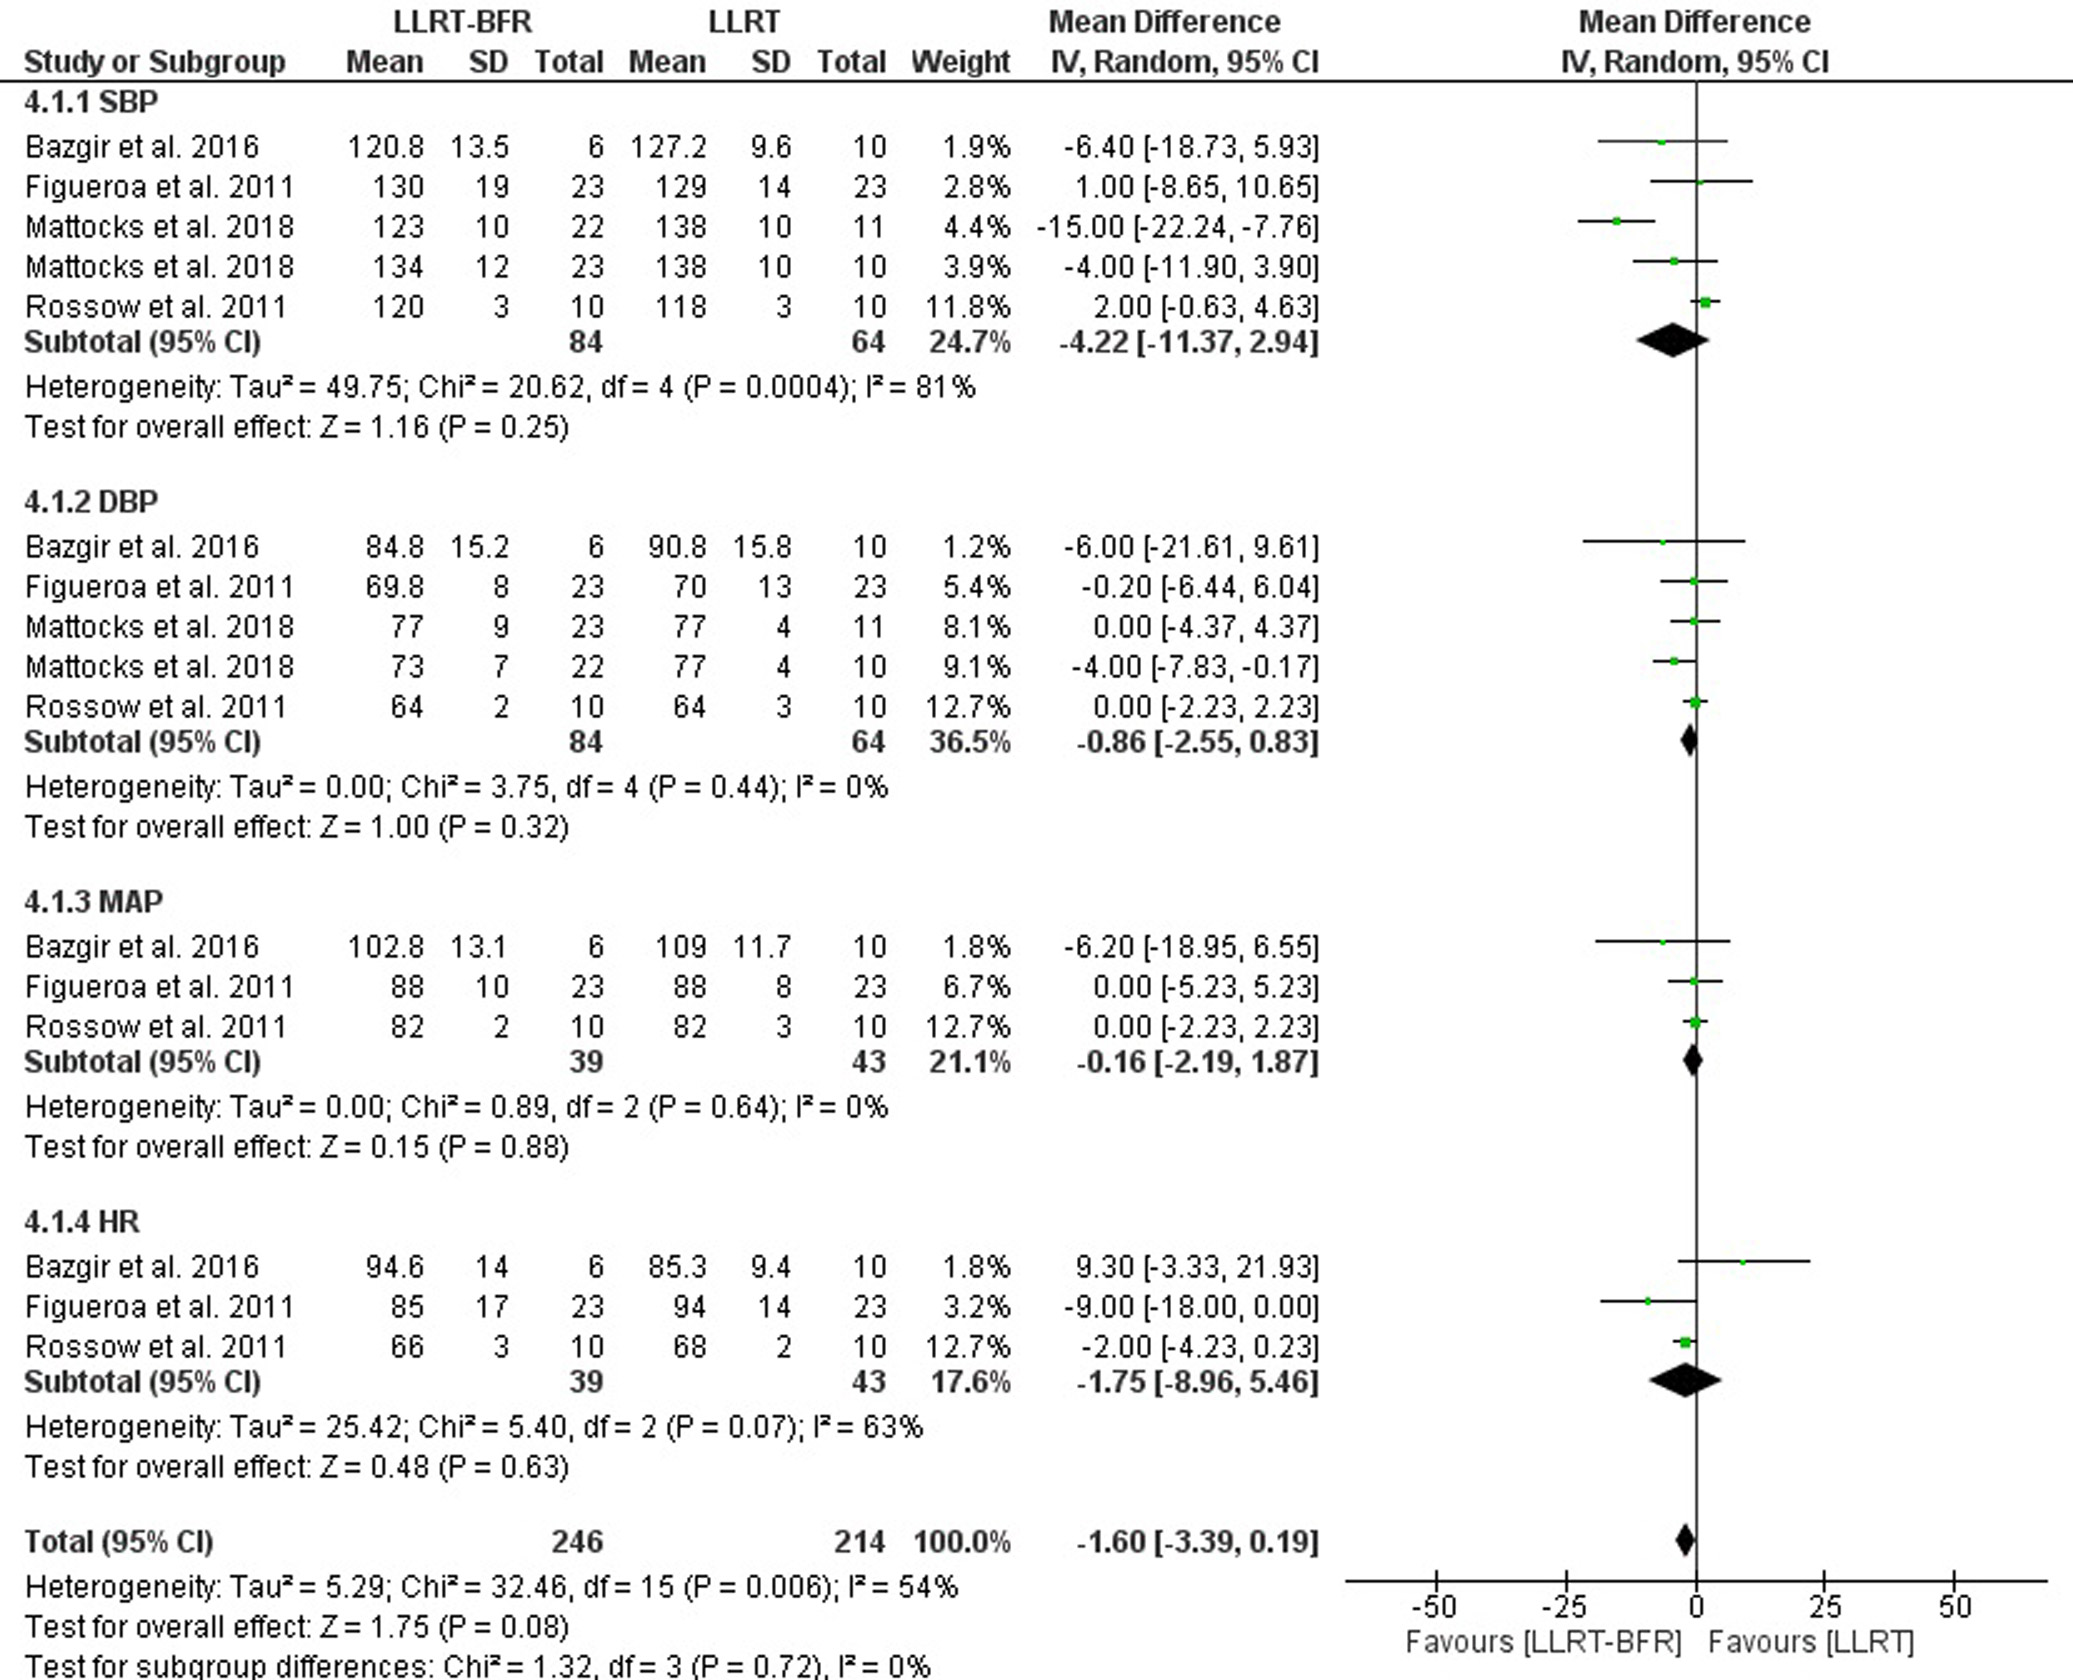
**

**Figure 1.** Forest plot illustrating the acute effects of LLRT-BFR compared to LLRT for lower limbs.

Legend: LLRT-BFR: low-load resistance training associated with blood flow restriction; LLRT: low-load resistance training; SBP: systolic blood pressure; DBP: diastolic blood pressure; MAP: mean arterial pressure; HR: heart rate; LL: lower limbs.

**
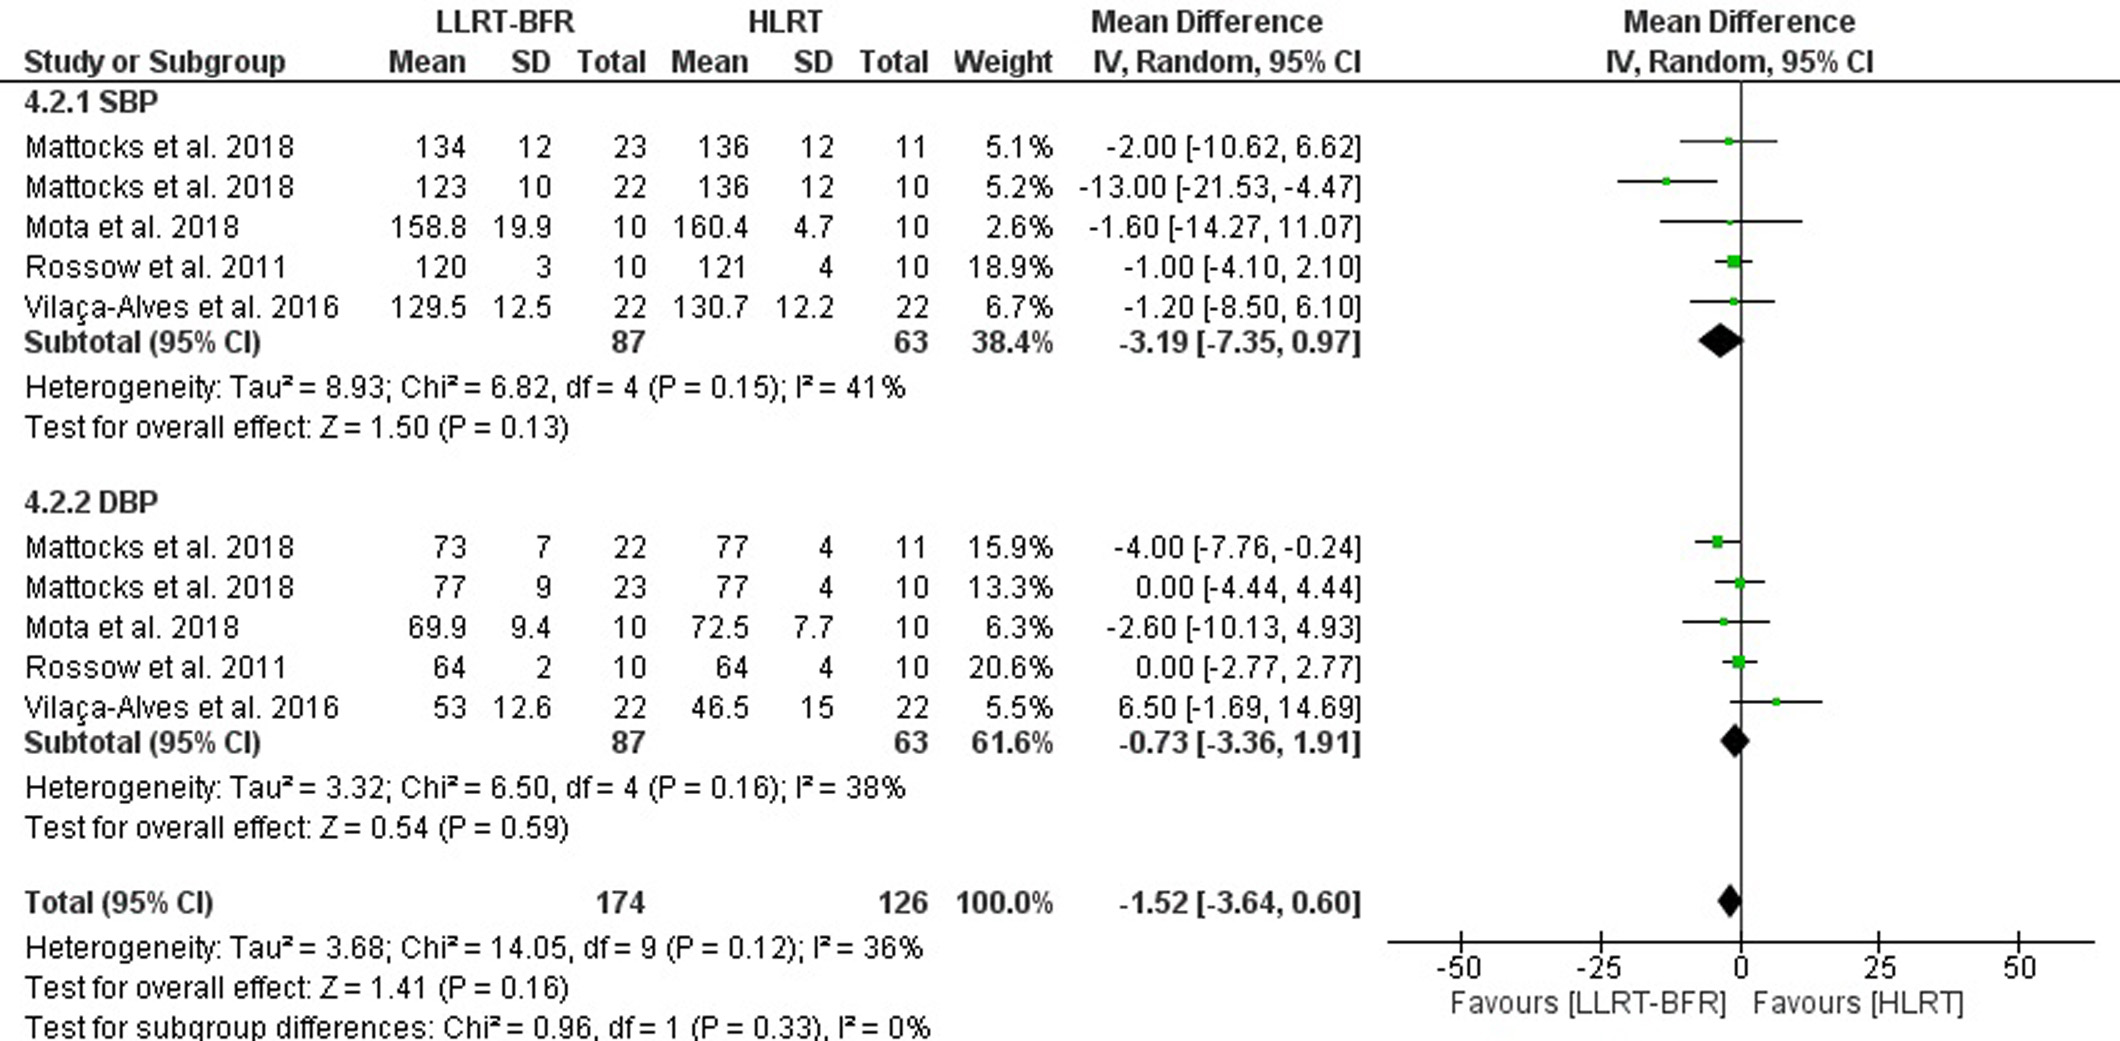
**

**Figure 2.** Forest plot illustrating the acute effects of LLRT-BFR compared to HLRT for lower limbs.

Legend: LLRT-BFR: low-load resistance training associated with blood flow restriction; HLRT: high-load resistance training; SBP: systolic blood pressure; DBP: diastolic blood pressure; LL: lower limbs.

**
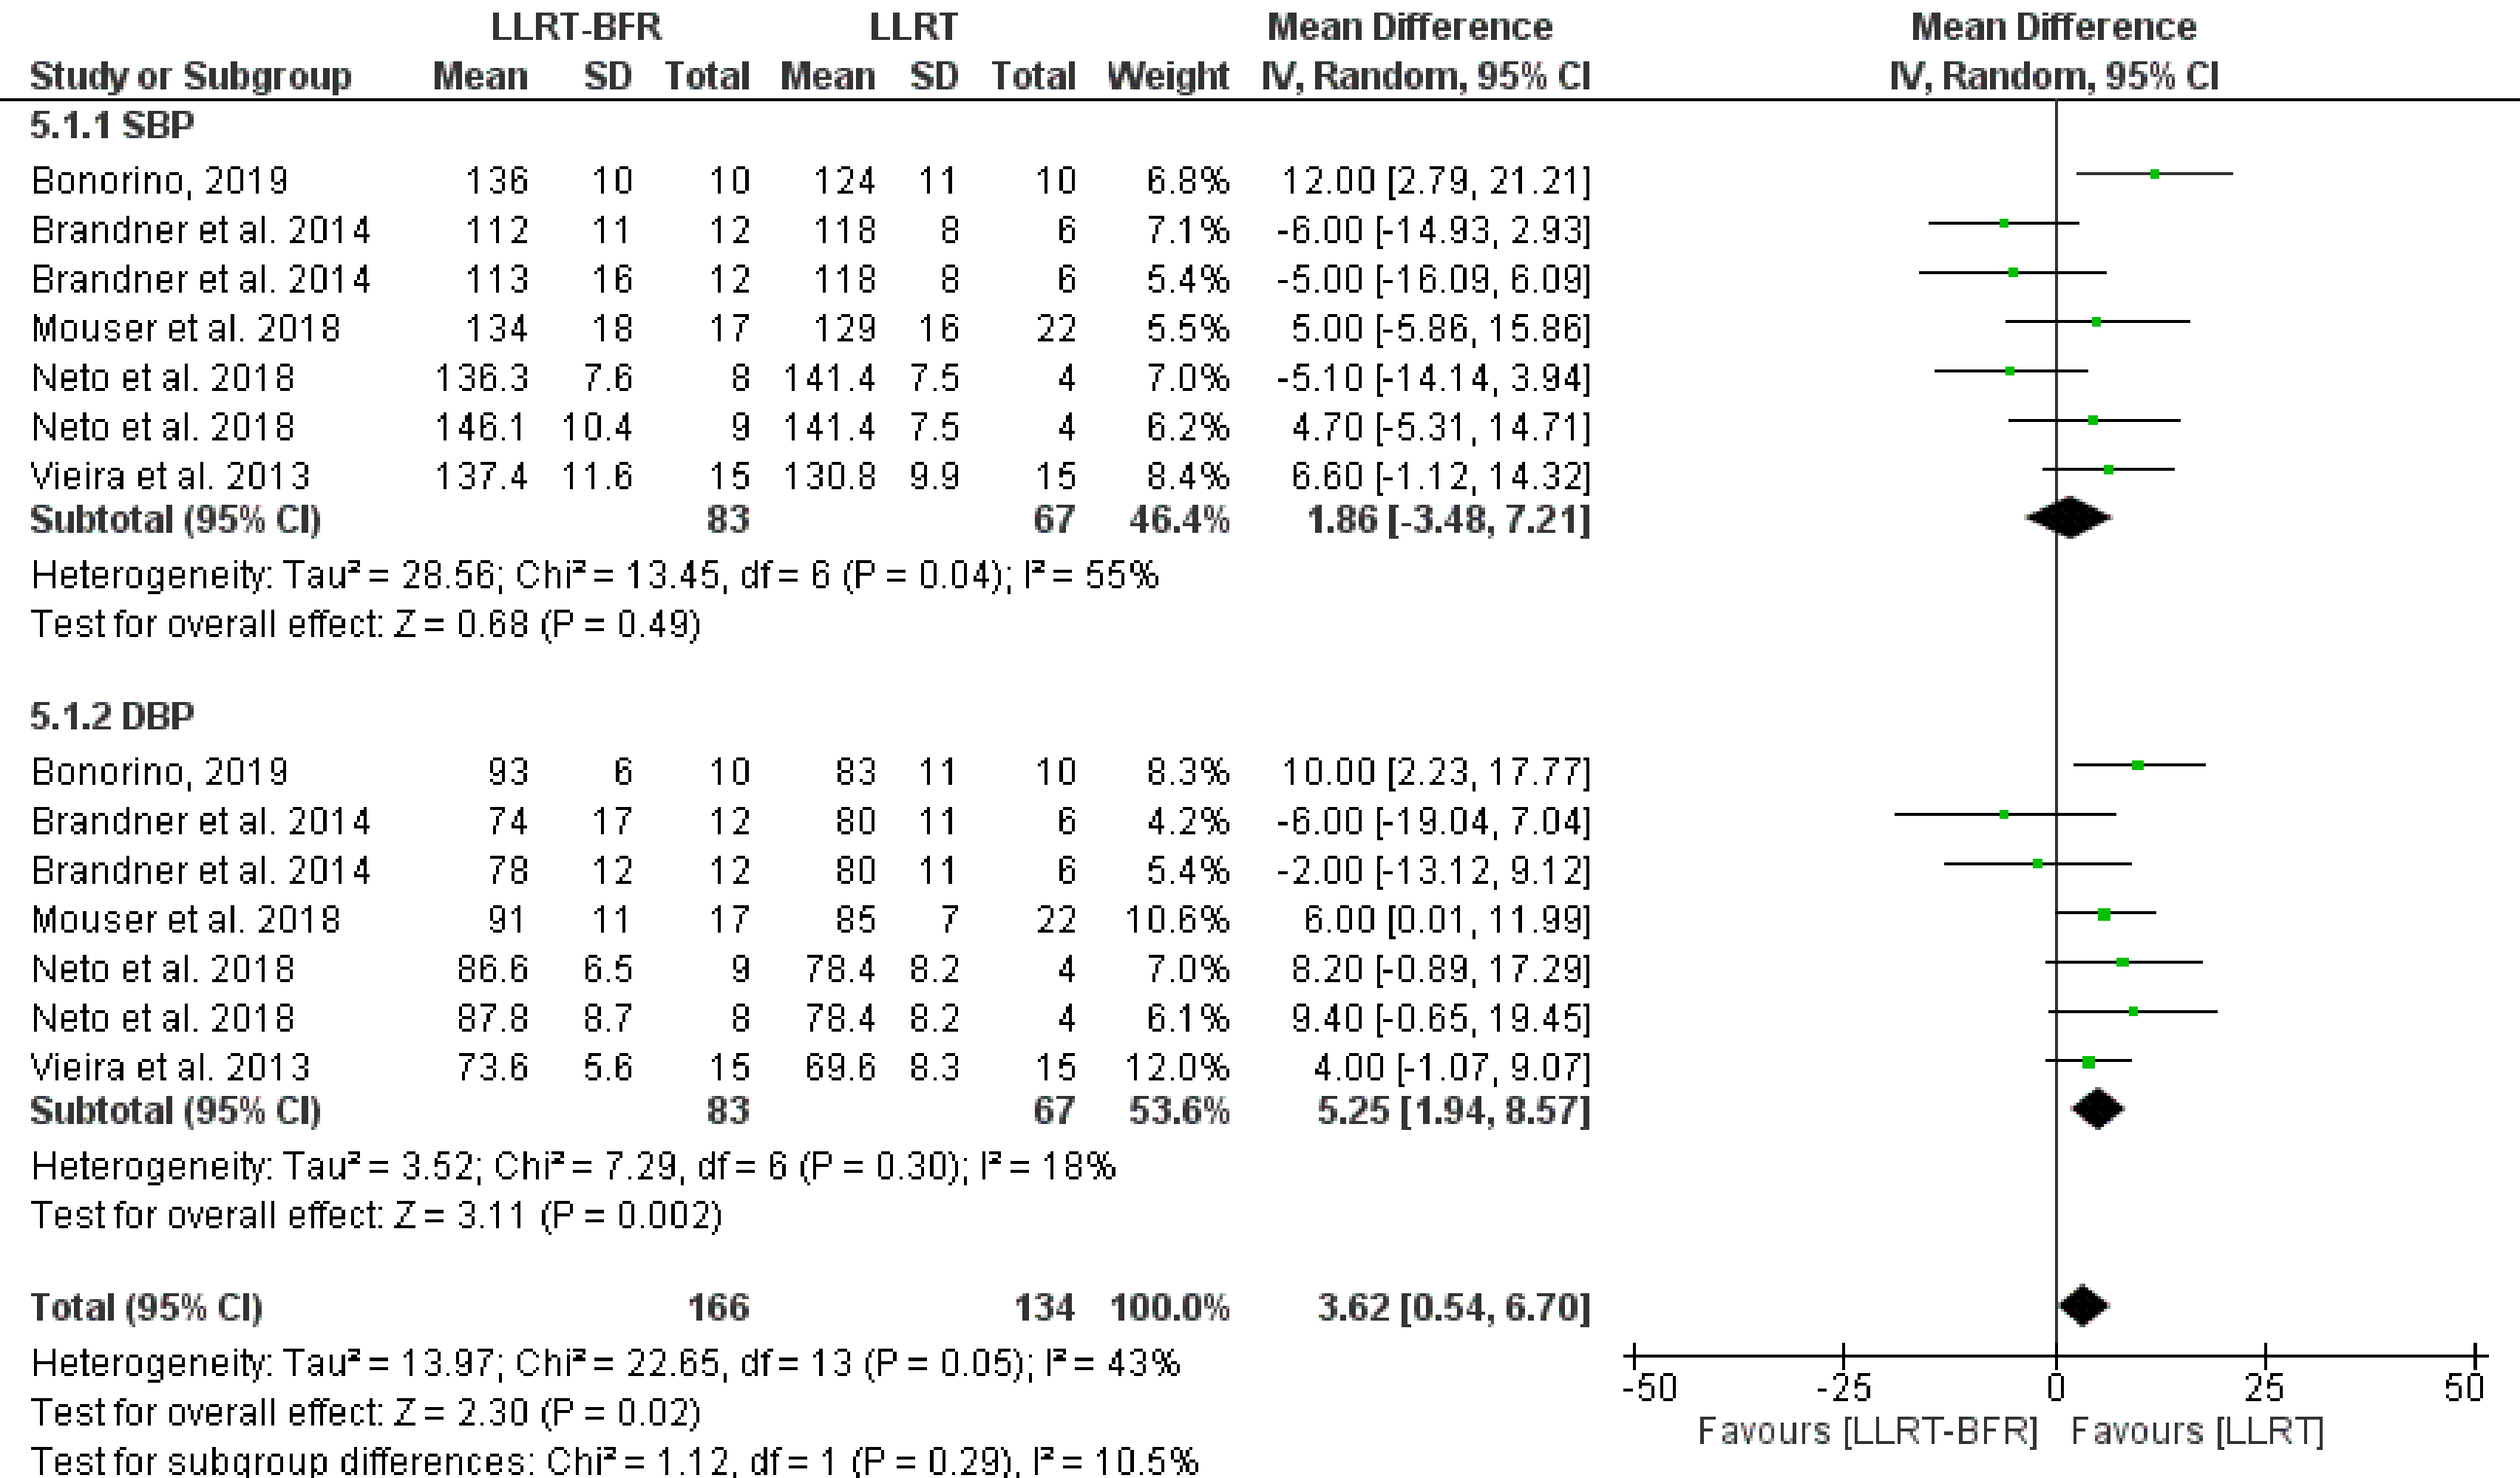
Figure 3.** Forest plot illustrating the acute effects of LLRT-BFR compared to LLRT for upper limbs.

Legend: LLRT-BFR: low-load resistance training associated with blood flow restriction; LLRT: low-load resistance training; SBP: systolic blood pressure; DBP: diastolic blood pressure; UL: upper limbs.

**
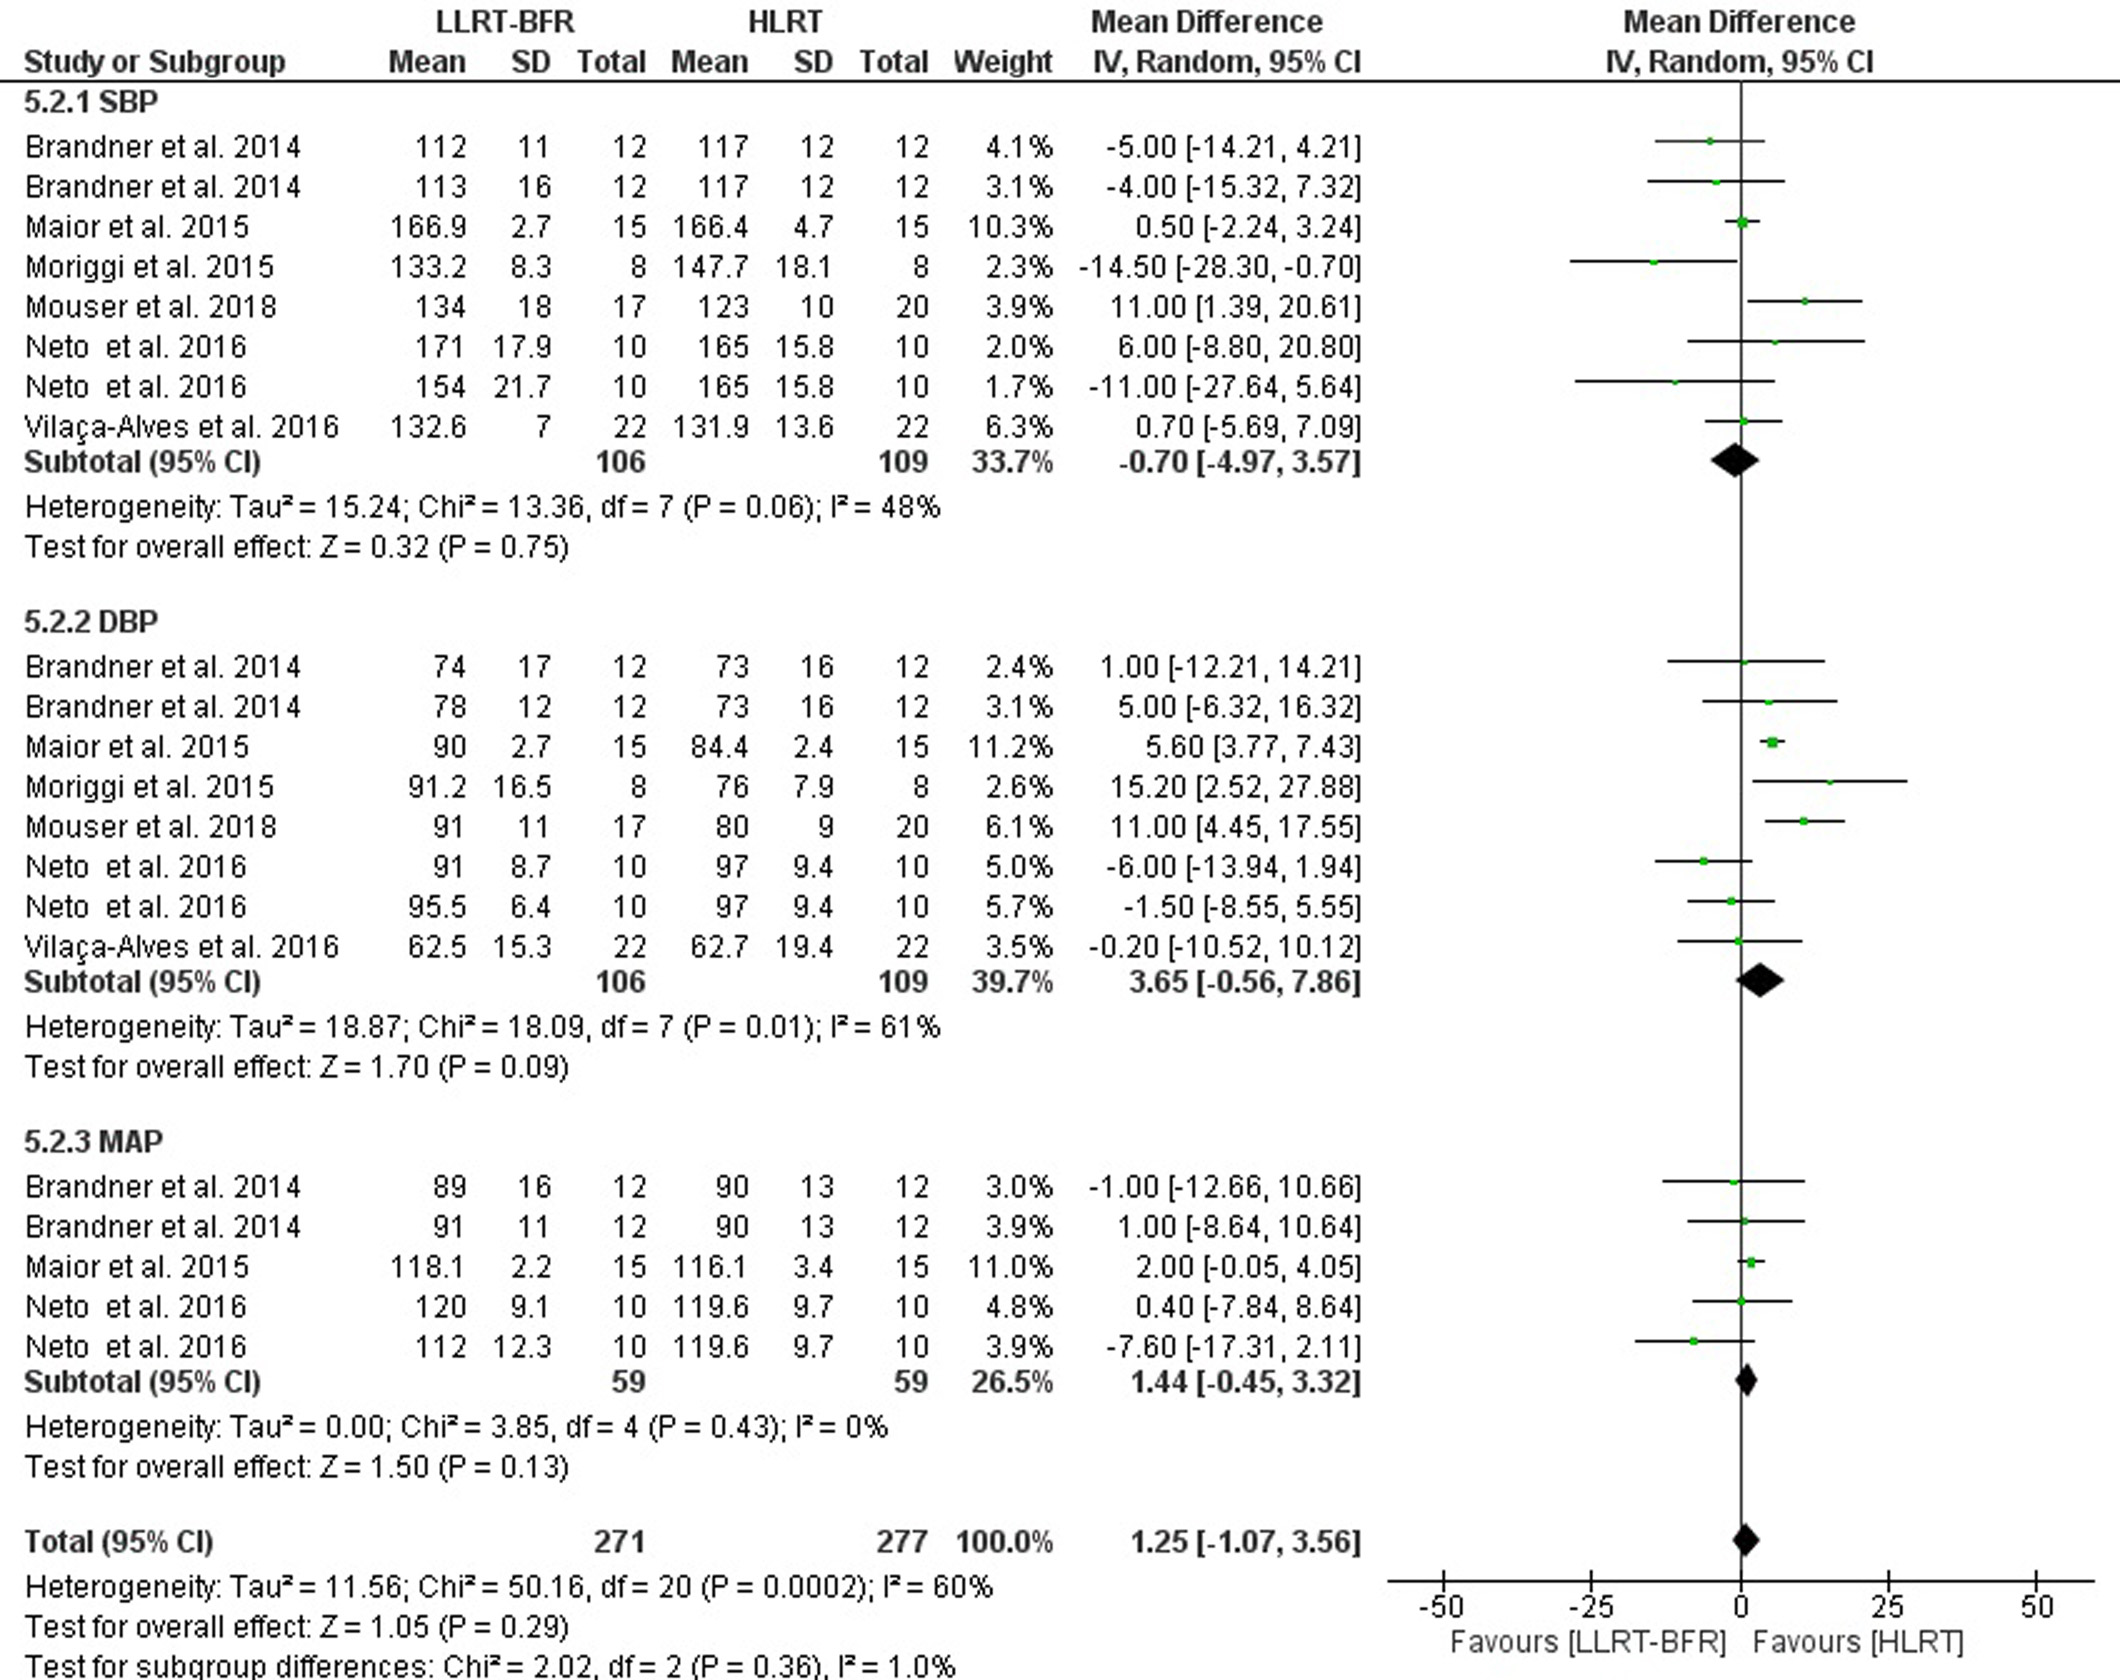
**

**Figure 4.** Forest plot illustrating the acute effects of LLRT-BFR compared to HLRT for upper limbs.

Legend: LLRT-BFR: low-load resistance training associated with blood flow restriction; HLRT: high-load resistance training; SBP: systolic blood pressure; DBP: diastolic blood pressure; MAP: mean arterial pressure; UL: upper limbs.

**
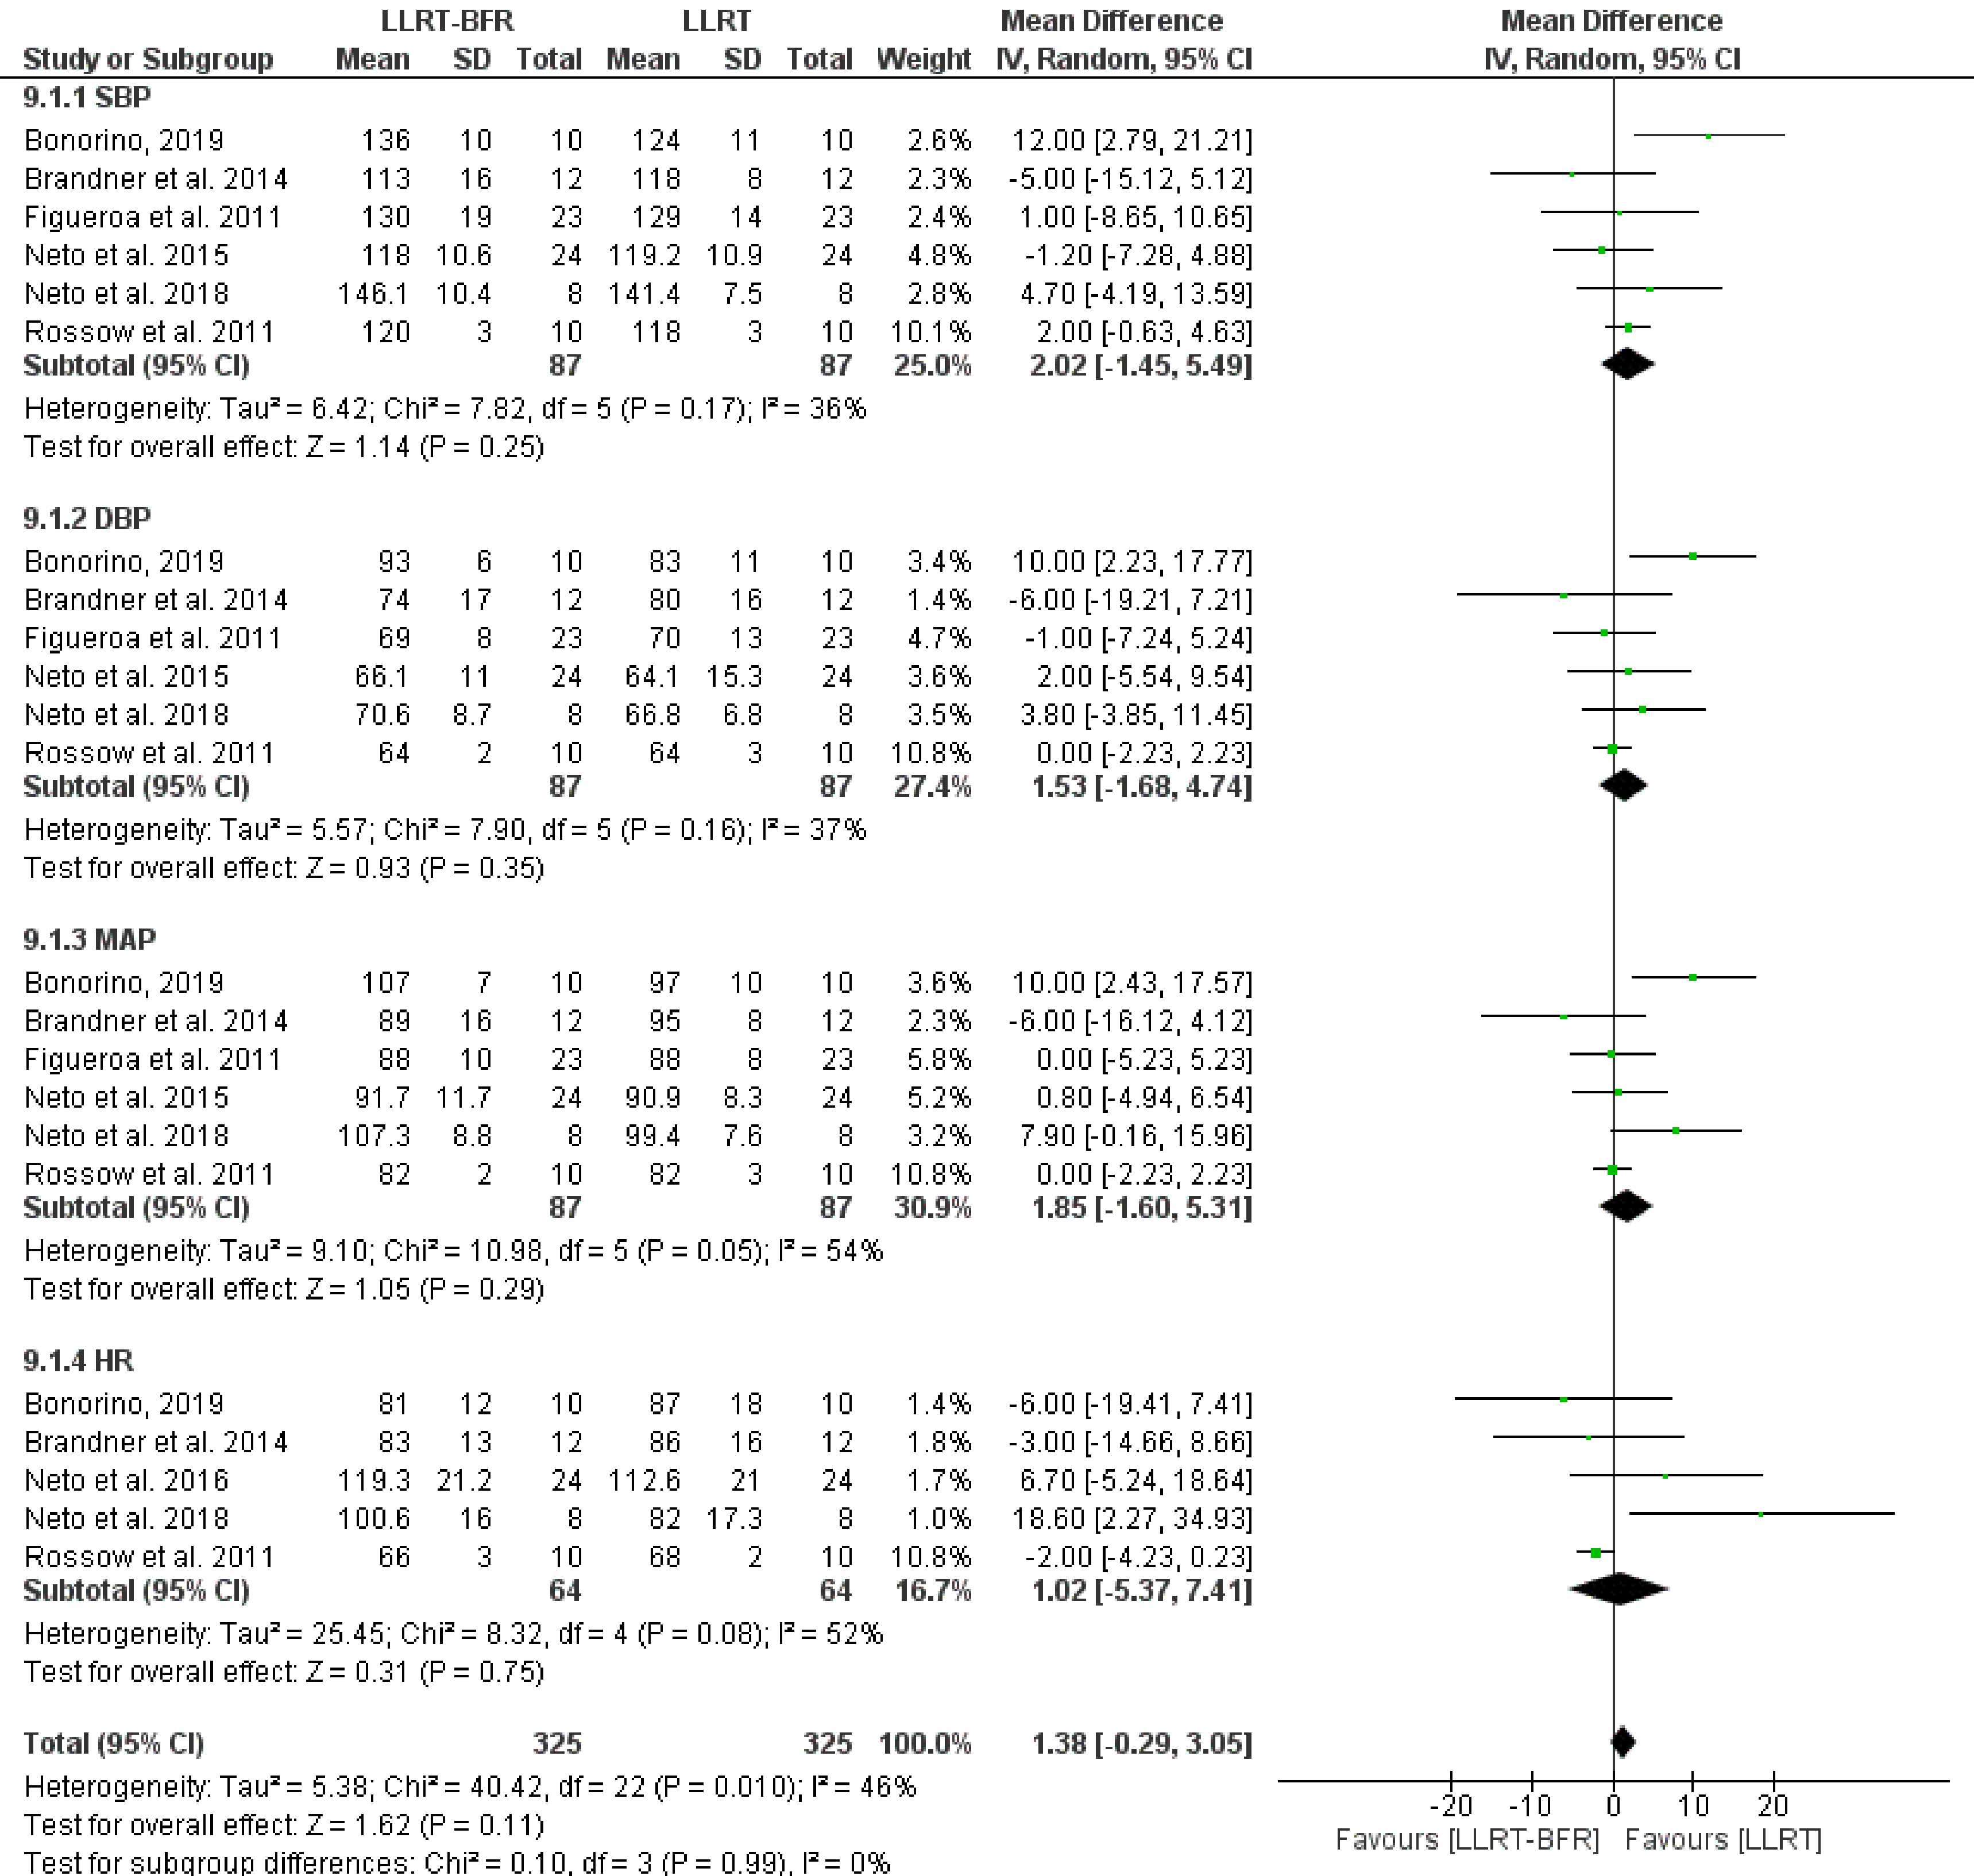
**

**Figure 5.** Forest plot illustrating the acute effects of LLRT-BFR compared to LLRT with intermittent blood flow restriction.

Legend: LLRT-BFR: low-load resistance training associated with blood flow restriction; LLRT: low-load resistance training; SBP: systolic blood pressure; DBP: diastolic blood pressure; MAP: mean arterial pressure; HR: heart rate.


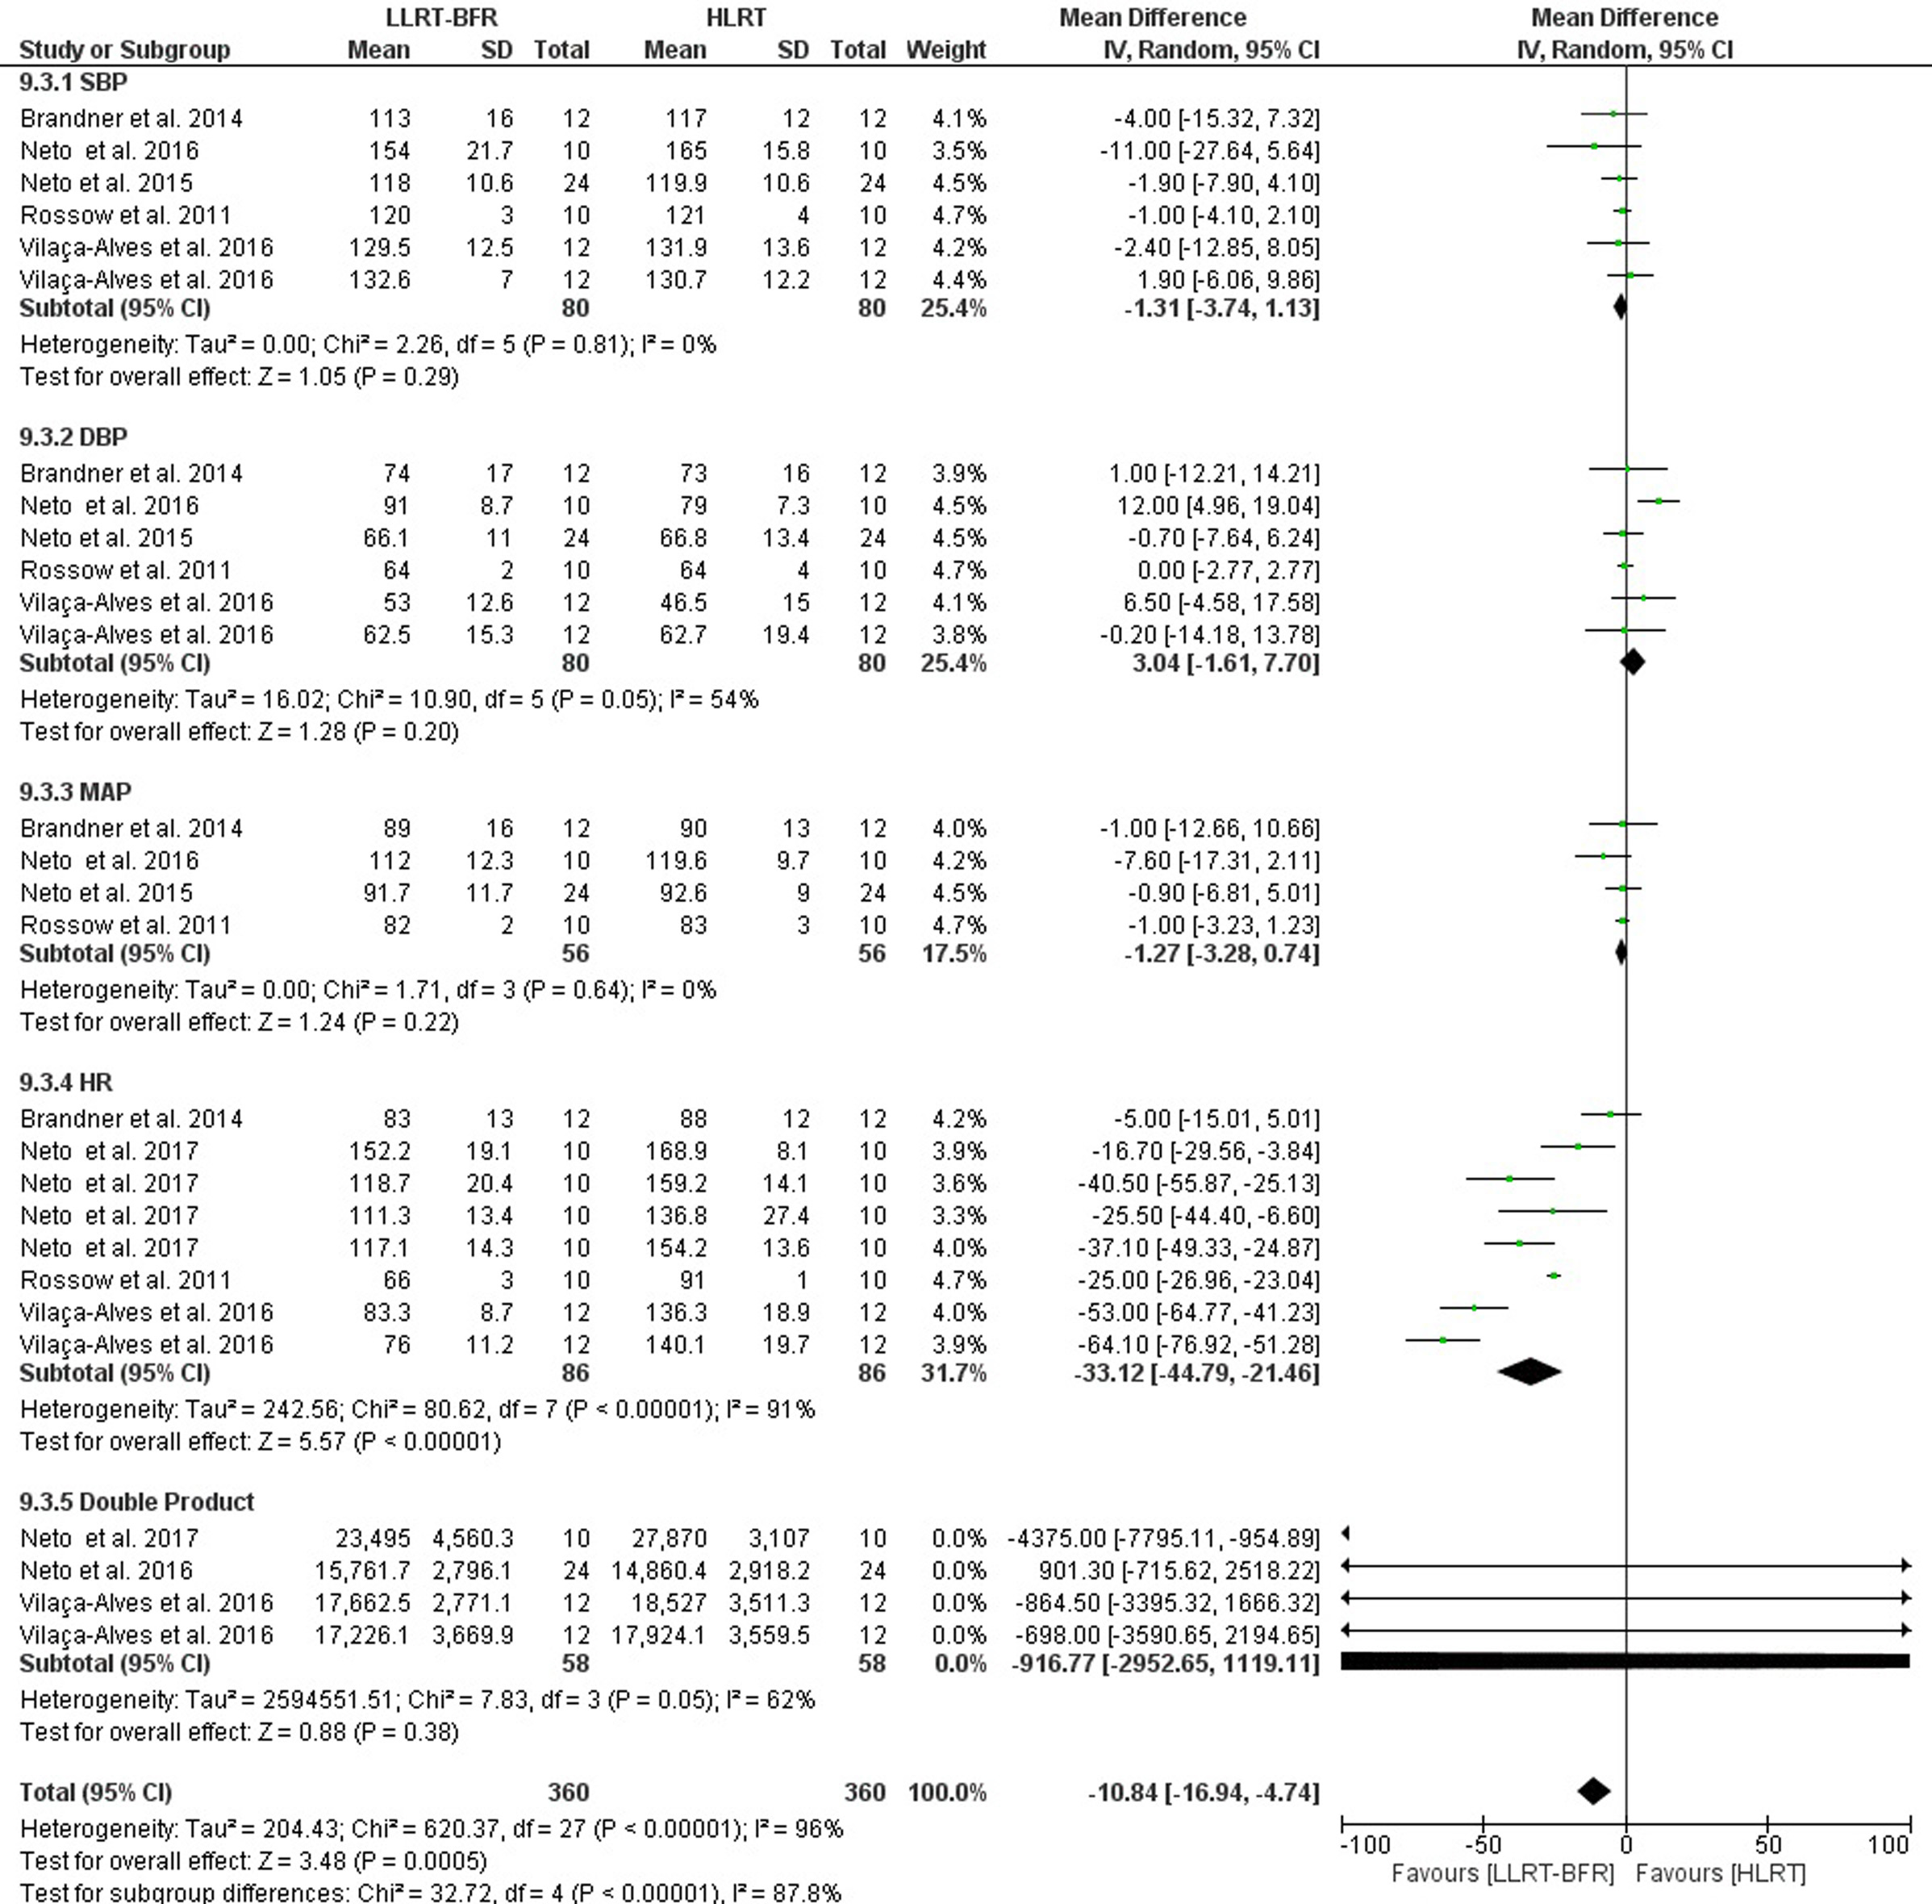


**Figure 6.** Forest plot illustrating the acute effects of LLRT-BFR compared to HLRT with intermittent blood flow restriction.

Legend: LLRT-BFR: low-load resistance training associated with blood flow restriction; HLRT: high-load resistance training; SBP: systolic blood pressure; DBP: diastolic blood pressure; MAP: mean arterial pressure; HR: heart rate

**
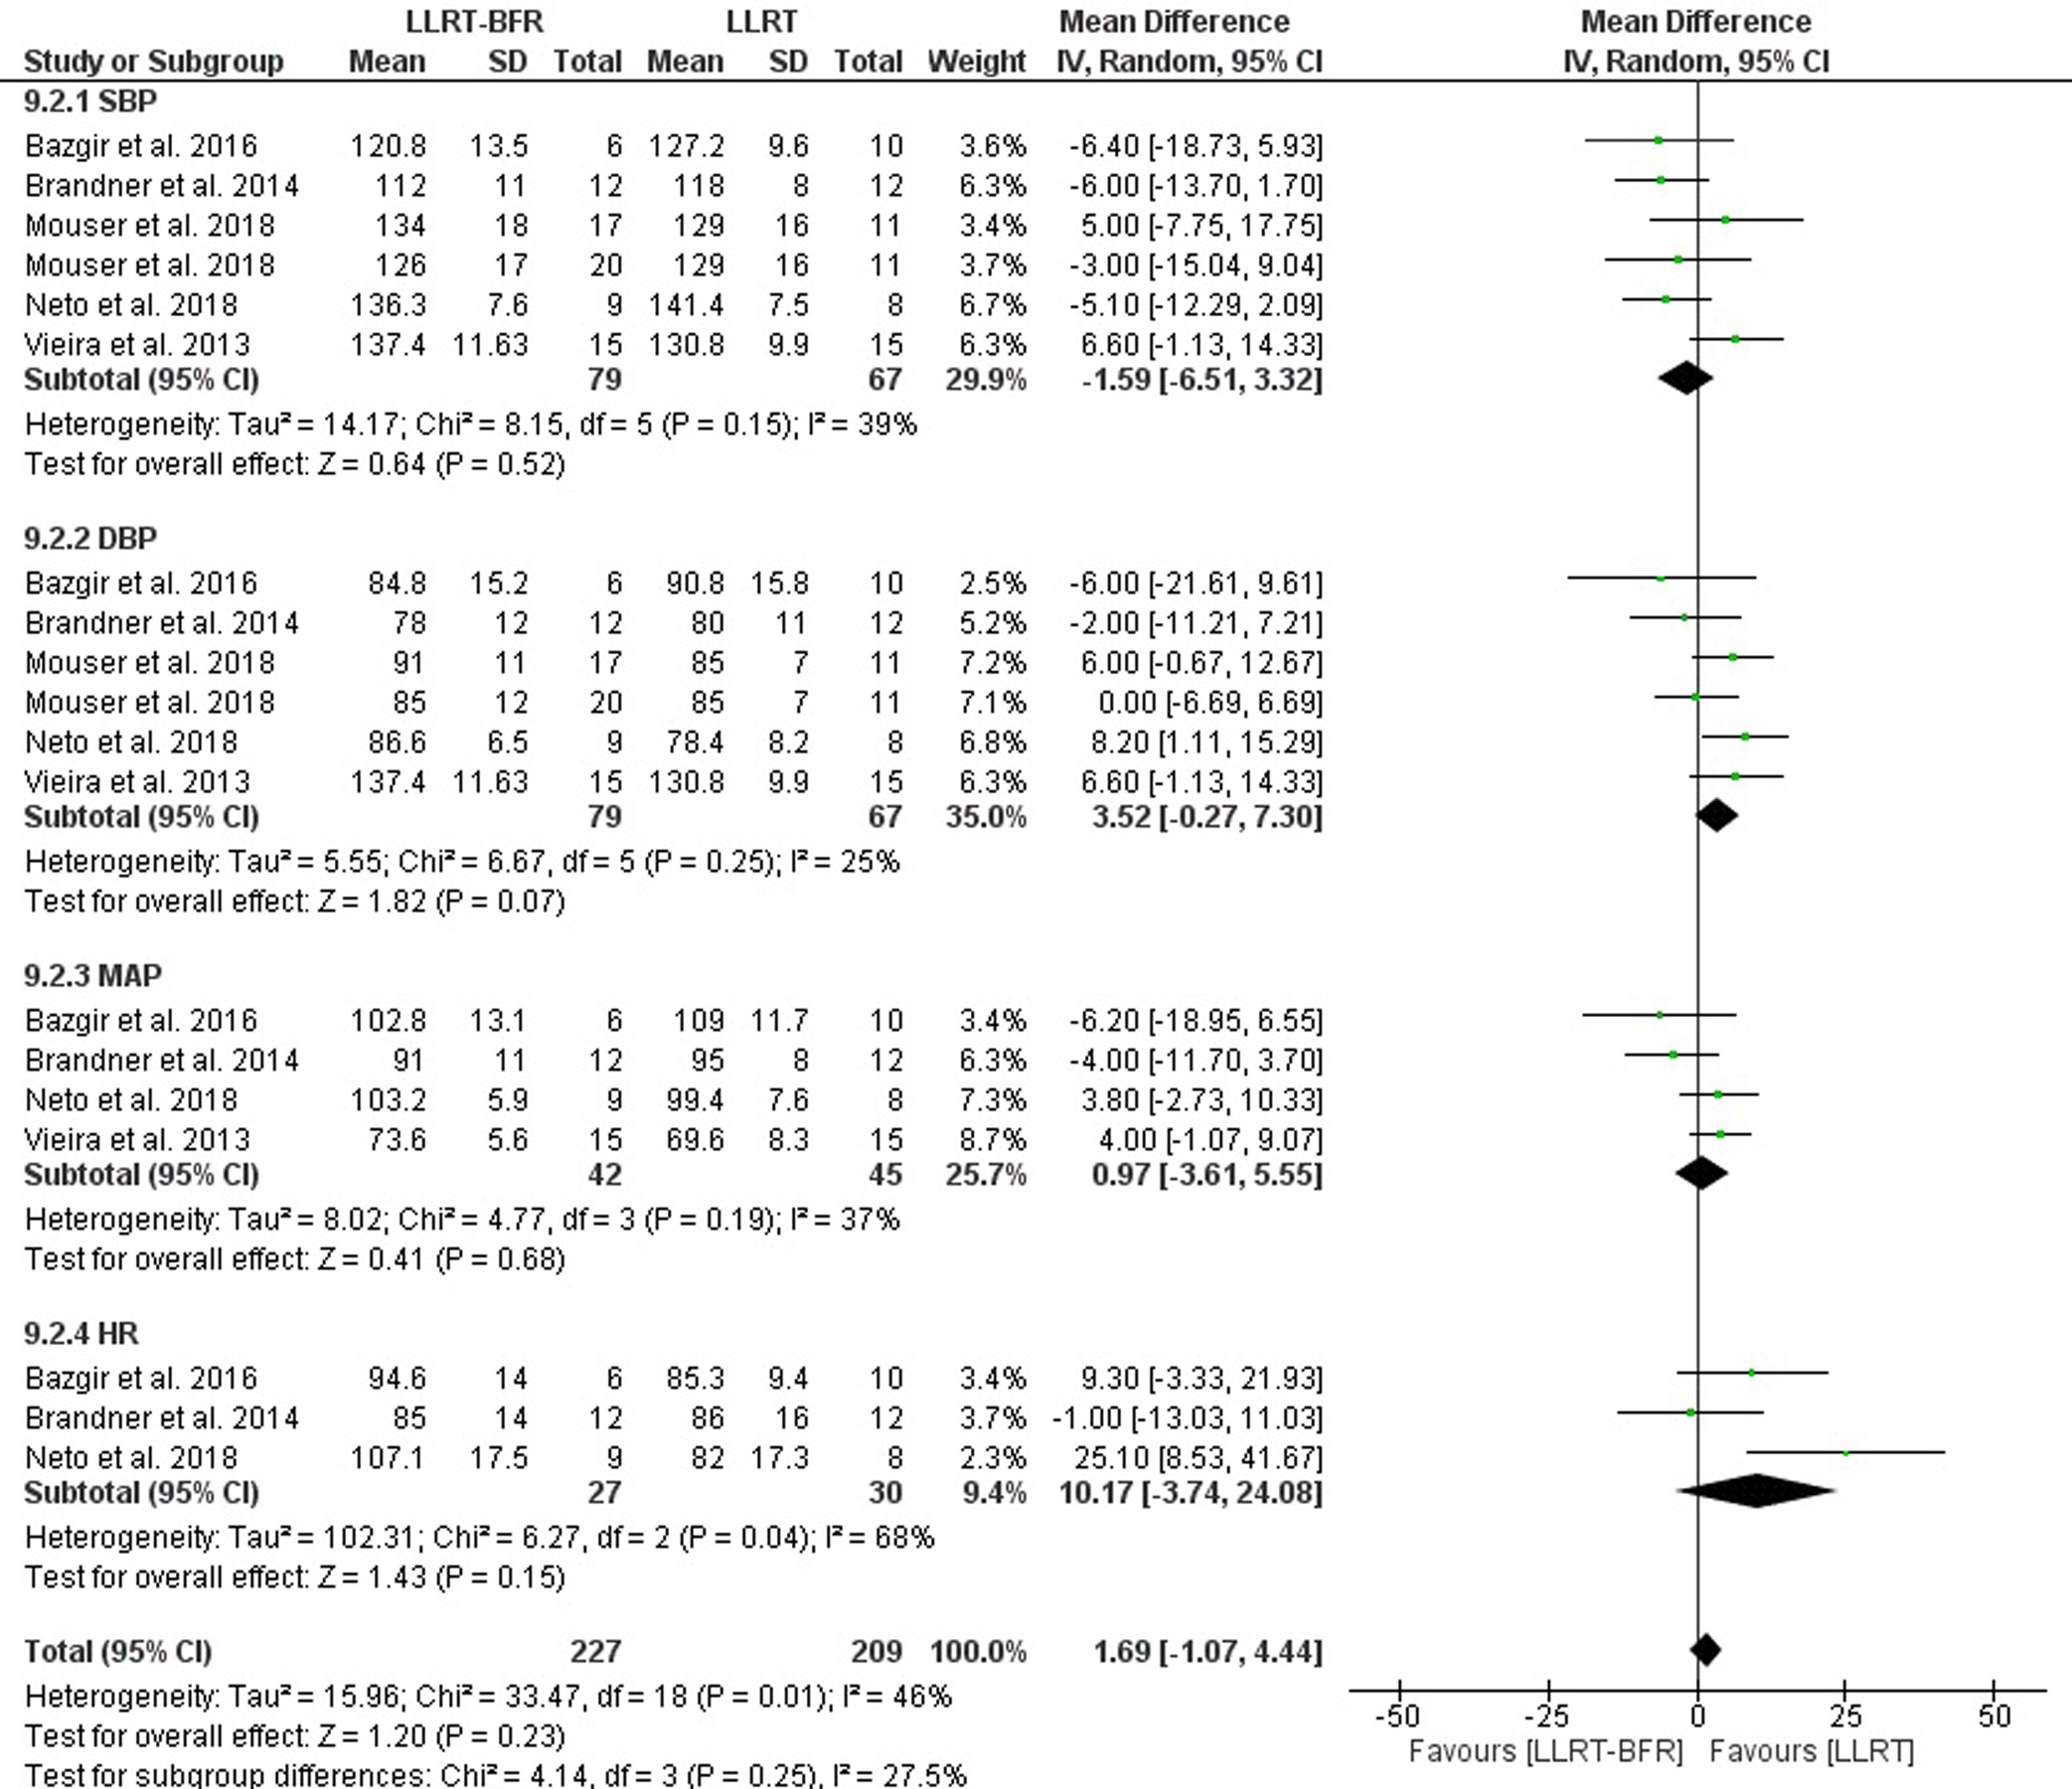
**

**Figure 7.** Forest plot illustrating the acute effects of LLRT-BFR compared to LLRT with continuous blood flow restriction.

Legend: LLRT-BFR: low-load resistance training associated with blood flow restriction; LLRT: low-load resistance training; SBP: systolic blood pressure; DBP: diastolic blood pressure; MAP: mean arterial pressure; HR: heart rate.

**
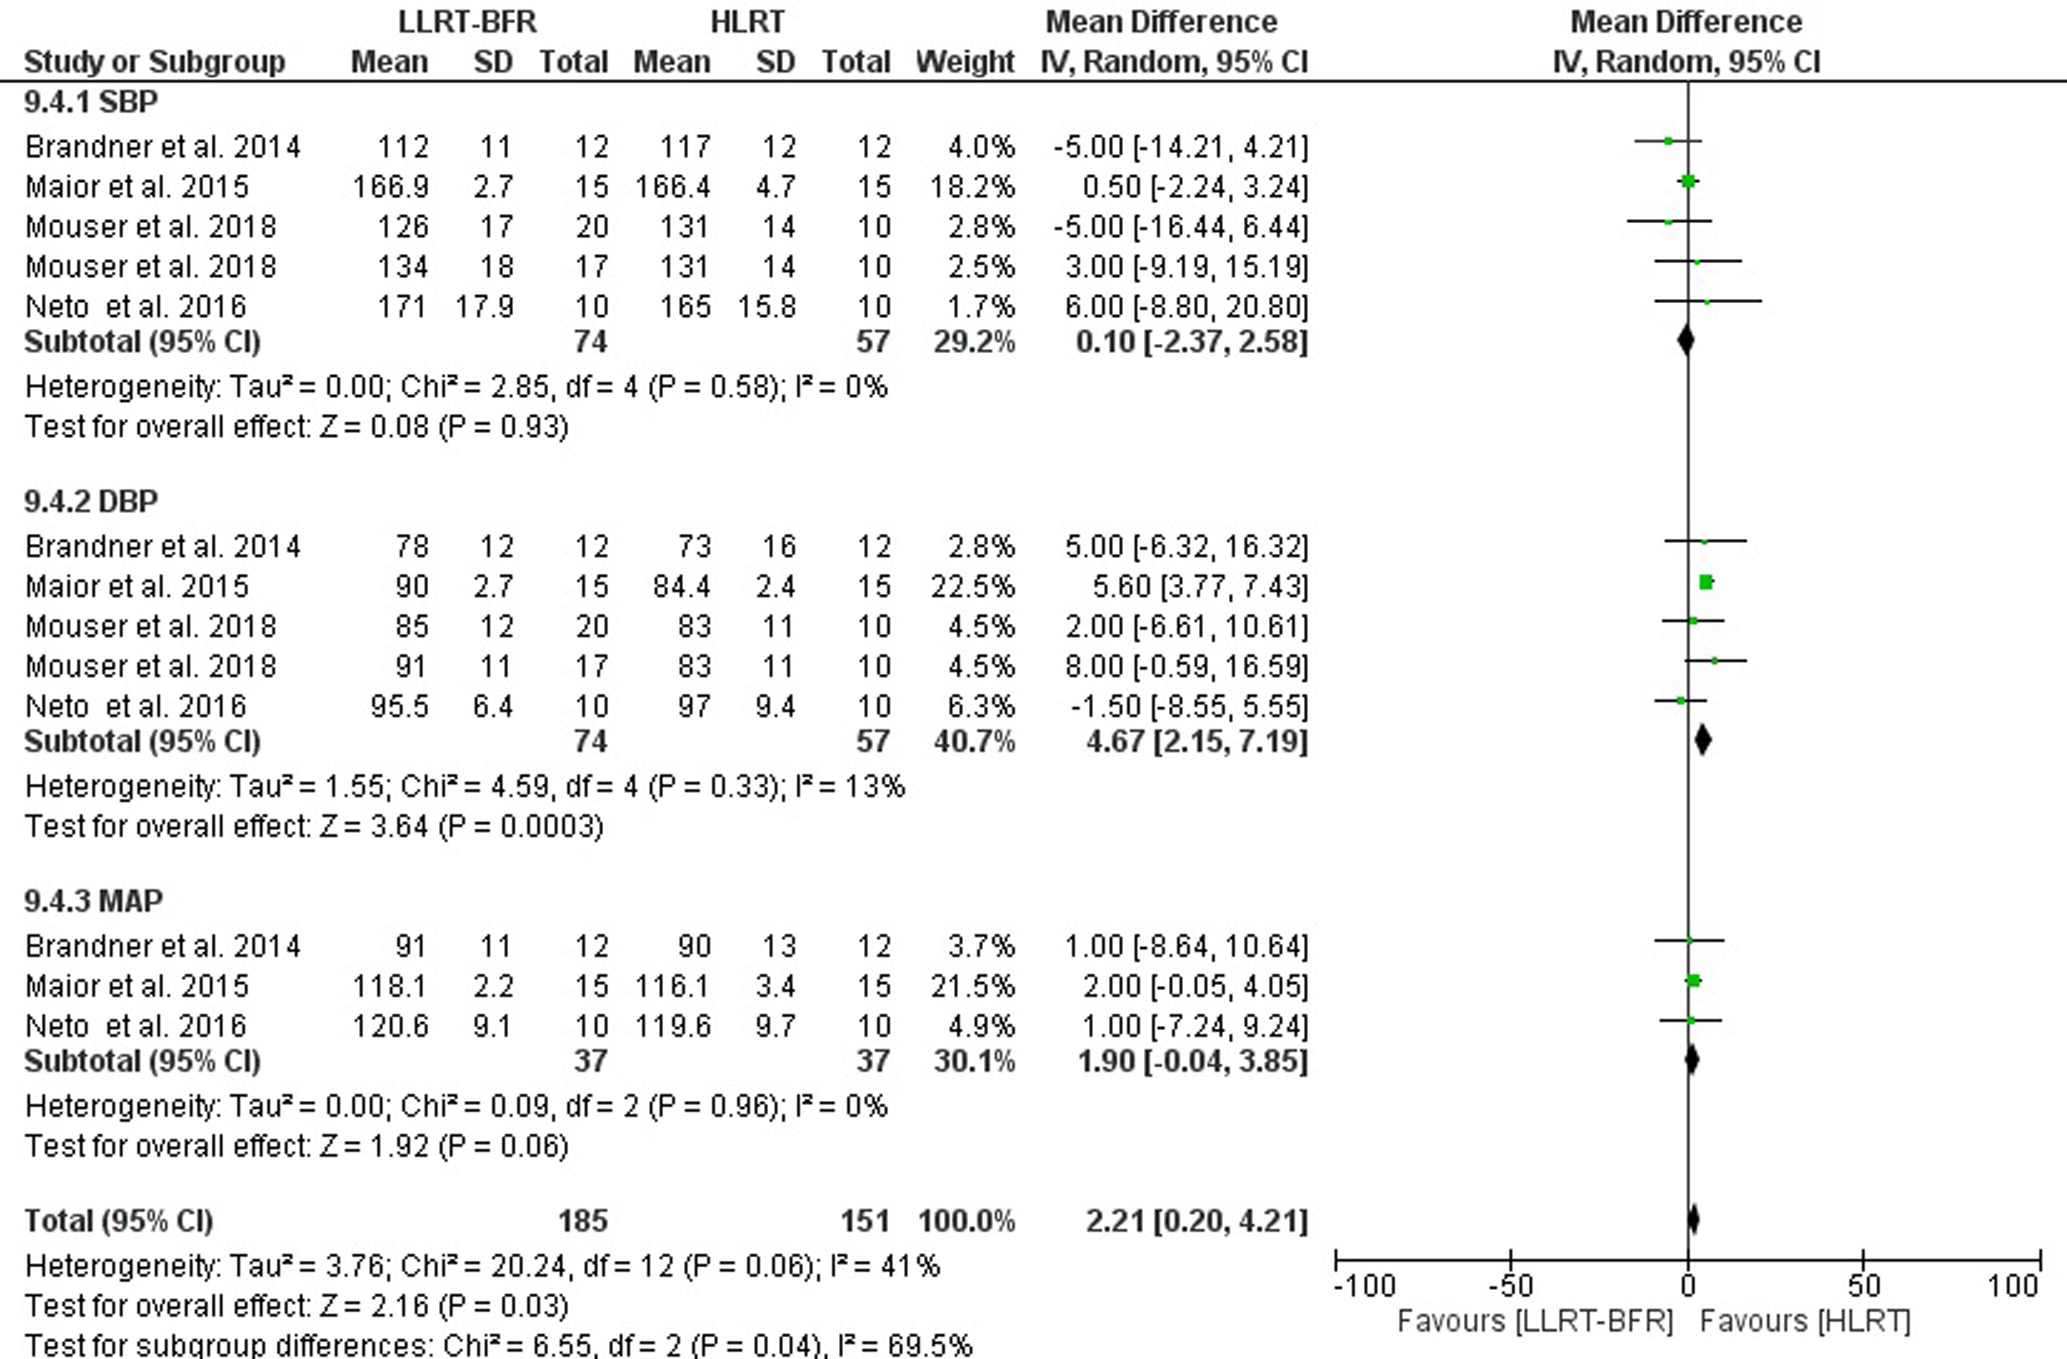
**

**Figure 8.** Forest plot illustrating the acute effects of LLRT-BFR compared to HLRT with continuous blood flow restriction.

Legend: LLRT-BFR: low-load resistance training associated with blood flow restriction; HLRT: high-load resistance training; SBP: systolic blood pressure; DBP: diastolic blood pressure; MAP: mean arterial pressure.
